# Supplementary material
Source: Springer Nature journal article supplement (https://www.springermedizin.de/resource/supplementary/12889_2011_3943_MOESM1_ESM.pdf/9491166)
Supplement: MOESM1 [file 9491166]

**HIV-positive women attending cervical screening consultation**  
**n=3090**

**Exclusions\* n=92 (3.0%)**

**Eligible women**  
**n=2998 (97.0%)**

**Normal VI†**  
**n=2382**  
**(79.4%)**

**Inflammatory lesions‡ n=290 (9.7%)**  
LTFU, n=105 (36.2%)  
Positive VI, n= 23/185 (12.4%)

**Positive VI**  
**n=245 (8.2%)**

**Not evaluable**  
SCJ not visible  
**n=81 (2.7%)**

**HIV-positive women referred for colposcopic examination (n=349)**  
**268 positive VI: 9.0% (95% CI 8.0-10.0)**  
230 positive with VIA: 7.7% (95% CI 6.7-8.6)  
255 positive with VILI: 8.5% (95% CI 7.5-9.5)

132 histological confirmations  
**4.4% (95% CI 3.7-5.1)**  
CIN 1 (n=115), CIN 2/3 (n=14), ICC (n=3)

73 LTFU‡  
**20.9% (95% CI 16.7-25.2)**

**HIV-negative women attending cervical screening consultation**  
**n=1118**

**Exclusions\* n=70 (6.3%)**

**Eligible women**  
**n=1048 (93.7%)**

**Normal VI†**  
**n=922**  
**(88.0%)**

**Inflammatory lesions‡ n=64 (6.1%)**  
LTFU, n=10 (15.6%)  
Positive VI, n= 3/54 (5.5%)

**Positive VI**  
**n=38 (3.6%)**

**Not evaluable**  
SCJ not visible  
**n=24 (2.3%)**

**HIV-negative women referred for colposcopic examination (n=65)**  
**41 positive VI: 3.9% (95% CI 2.7-5.1)**  
20 positive with VIA: 1.9% (95% CI 1.1-2.7)  
37 positive with VILI: 3.5% (95% CI 2.4-4.6)

20 histological confirmations  
**1.9% (95% CI 1.1-2.7)**  
CIN 1 (n=17), CIN 2/3 (n=0), ICC (n=3)

9 LTFU‡  
**13.8% (95% CI 5.5-22.2)**
